# Supplementary material
Source: Springer Nature journal article supplement (https://www.springermedizin.de/resource/supplementary/12889_2014_6989_MOESM6_ESM.pdf/9499522)
Supplement: MOESM6 [file 9499522]

Table 1. Sampling matrix for the qualitative arm of the study of use and acceptance of long lasting insecticidal screens on doors and windows in houses and schools for dengue prevention in Acapulco, Guerrero, Mexico.

| <b>Method</b>                                     | <b>Number recruited</b>                                                                                                                                                                              | <b>Recruitment criteria</b>               |
|---------------------------------------------------|------------------------------------------------------------------------------------------------------------------------------------------------------------------------------------------------------|-------------------------------------------|
| Focus groups                                      | 6 groups:<br>FGD1→ 5 participants (women)<br>FGD2→ 6 participants (men)<br>FGD3→ 3 participants (men)<br>FGD4→ 8 participants (women)<br>FGD5→ 10 participants (men)<br>FGD6→ 8 participants (women) | Accepted the mosquito screens             |
| Key Informant Interviews with school teachers     | 3 semi-structured interviews                                                                                                                                                                         | Responsible for the screens in the school |
| Key Informant Interviews with project staff       | 3 semi-structured interviews                                                                                                                                                                         | Key role in project implementation        |
| Key Informant Interviews with people who rejected | 2 semi-structured interviews                                                                                                                                                                         | Rejected the mosquito screens             |
